## Title page

### Title

Social-media based health education plus exercise programme (SHEEP) to improve muscle function among young-old adults with possible sarcopenia in the community:  
A feasibility study protocol

### Author names, affiliations and email addresses

Ya Shi<sup>1,2\*</sup>, Emma Stanmore<sup>1,3,4</sup>, Lisa McGarrigle<sup>1,3</sup>, Chris Todd<sup>1,3,4</sup>

1 School of Health Sciences, Faculty of Biology, Medicine & Health, University of Manchester, Manchester, UK

2 School of Nursing & School of Public Health, Yangzhou University, Yangzhou, Jiangsu province, China

3 School of Health Sciences and Manchester Academic Health Science Centre (MAHSC), University of Manchester, Manchester, UK

4 Manchester University NHS Foundation Trust, Manchester, UK

### ORCID iDs

Ya Shi <http://orcid.org/0000-0002-4877-2312>

Emma Stanmore <http://orcid.org/0000-0002-4522-5292>

Lisa McGarrigle <http://orcid.org/0000-0002-0533-3029>

Chris Todd <http://orcid.org/0000-0001-6645-4505>

### \* Corresponding author

[ya.shi@postgrad.manchester.ac.uk](mailto:ya.shi@postgrad.manchester.ac.uk) (YS)

### Word count

6105 words

### Twitter

Emma Stanmore @emmastanmore

Lisa McGarrigle @mcgarrigle\_lisa

Chris Todd @Prof\_Chris\_Todd

### Author contributions

Ya Shi: Conceptualization; Data curation; Formal analysis; Funding acquisition; Investigation; Methodology; Project administration; Resources; Software; Visualization; Writing - original draft preparation.

Emma Stanmore: Conceptualization; Methodology; Project administration; Resources; Supervision; Validation; Writing - review & editing.

Lisa McGarrigle: Conceptualization; Methodology; Project administration; Resources;

Supervision; Validation; Writing - review & editing.

Chris Todd: Conceptualization; Funding acquisition; Methodology; Project administration; Resources; Supervision; Validation; Writing - review & editing.

### **Funding**

YS is funded by the University of Manchester - China Scholarship Council Joint Scholarship (202108320049), and CT is funded by the National Institute for Health and Care Research Senior Investigator Award (NIHR200299). LM is funded through the National Institute for Health and Care Research (NIHR). She was funded by NIHR Senior Investigator Award to Prof Todd (NIHR200299) until March 2023 and then by NIHR Policy Research Unit in Older People and Frailty (PR-PRU-1217-2150). As of 01.01.24, the unit has been renamed to the NIHR Policy Research Unit in Healthy Ageing (NIHR206119). The views expressed are those of the author(s) and not necessarily those of the NIHR or the Department of Health and Social Care or its partner organisations. No funding bodies had any role in study design, data collection and analysis, decision to publish, or preparation of the manuscript.

### **Competing Interests:**

The authors have declared that no competing interests exist.

### **Data Availability Statement:**

Deidentified research data will be made publicly available when the study is completed and published.

**Social-media based  
health education plus exercise programme (SHEEP) to improve muscle function  
among young-old adults with possible sarcopenia in the community:  
A feasibility study protocol**

## **Abstract**

### **Background**

Despite the comparatively high prevalence of possible sarcopenia among young-old adults in the community, there is currently no available and effective social media-based intervention to increase the awareness and behaviour of the target population in order to prevent sarcopenia. Using co-design methodology, we developed a multicomponent intervention strategy of health education and exercise for sarcopenia prevention utilizing the TikTok platform.

### **Objectives**

Primary purpose of this study is to examine the feasibility and acceptability of the social media-based intervention to enhance muscle function in community-dwelling young-old adults with possible sarcopenia.

### **Methods**

This protocol outlines the entire research procedure for a prospective single-arm pre-post feasibility study employing a mixed-method design, which will be conducted between May 2024 and September 2024. 35 older adults aged 60-69 years with possible sarcopenia will be recruited from two communities in Changsha, China. Based on the TikTok platform, participants will be required to view a total of seven health education videos in the first week, and each video lasts four to six minutes. Then, participants will receive six-week multi-component exercise through TikTok, with at least three sessions/week, 30 minutes/session, and moderate intensity. Finally, six-week follow-up will be conducted. Data collection will be conducted at baseline, post-intervention and follow-up period. The primary outcome will include evaluating recruitment capability, data collection procedure, outcome measurement, intervention procedures' acceptability, researchers' ability to manage and implement the study, etc. The secondary outcome is to compare standard measures for muscle function (e.g. handgrip strength, skeletal muscle mass, physical performance), body composition (e.g. body fat, body mass index, bone mineral), and other measures (e.g. perceived knowledge, personal motivation, behavioural skills). Finally, all participants will be offered a semi-structured interview to assess their in-depth experiences with the intervention and

research process.

## **Discussion**

This study will be the first social-media based multicomponent intervention program for community young-old adults with possible sarcopenia to improve their muscle function, awareness and behaviour of preventing sarcopenia. Findings will generate new evidence regarding to the use of social media in health education for improving awareness of sarcopenia prevention, as well as the feasibility of using social media to influence participants' behavioural changes through exercise. This may help researchers identify ways to optimise acceptability and efficacy of the SHEEP intervention for the targeted population.

## **Trial registration**

ISRCTN registry, ISRCTN17269170, Registered 14 September 2023

## **Keywords**

Sarcopenia; Feasibility study; Social media; Health education; Exercise; Community young-old adults

## Introduction

Possible or probable sarcopenia is defined as age-related low muscle strength, with or without reduced physical performance [1,2]. It is highly prevalent among older adults in the community, particularly the young-old population [3]. Pérez-Sousa et al. [4] discovered that nearly half (46.5%) of the older Colombians in their cross-sectional study had probable sarcopenia, and that 52.0% of those diagnosed with probable sarcopenia were aged 60 to 69 years. Another cross-sectional study reported that the prevalence of possible sarcopenia was 48.1% among community-dwelling Chinese older people, with 33.1% between 60 and 74 years [5]. According to a population-based longitudinal study, the prevalence of older adults with possible sarcopenia was estimated to be 46.0% in the Chinese community, while nearly 71.0% of participants who reported possible sarcopenia were between the ages of 60 and 70 years [6]. Wu et al. [7] found that the overall prevalence of possible sarcopenia among older people in China was 38.5%, with 29.1% in the age group of 60~69 years.

Several factors such as age, gender, region, disease condition, physical inactivity, and fallen history were associated with possible sarcopenia. Evidence from relevant studies reveal that the prevalence of possible sarcopenia increases with age [5-9]. It is more prevalent in men than in women [5,10] and is higher in rural areas than urban areas [7]. In addition, having history of diabetes, hypertension, chronic lung diseases, chronic kidney disease, heart disease, arthritis, osteoarthritis, osteoporosis, rheumatism, frailty, malnutrition, depression and psychiatric conditions were associated with a higher risk of possible sarcopenia [4-7,9-11]. Older adults who were physical inactive [4-6,8,9] and had a history of falls [7] are more likely to have possible sarcopenia. Moreover, receiving higher level of education is associated with a lower risk of possible sarcopenia [6]. It is notable that some factors associated with this condition are preventable, treatable, and modifiable. Hence, the authoritative international associations for sarcopenia prevention recommend possible sarcopenia as a significant threshold in medical practice to trigger assessment of causes and initiate intervention [1,2].

There are a limited number of interventions specifically designed to prevent possible sarcopenia in community-dwelling older adults. For example, Merchant et al. [12] discovered that community-based dual-task exercise could improve handgrip strength, physical performance, perceived health, cognition, and reduce falls and frailty in Singaporean older adults with possible sarcopenia. Jones et al. [13] conducted a one-group, pre-post experimental study to examine the Healthy Beat Acupunch (non-invasive punching movements based on traditional Chinese medicine) exercise programme on sarcopenia prevention and found that it was simple, safe, appropriate, and beneficial for practice by Australian older adults with probable sarcopenia, and

could improve participants' gait speed. Another recent Taiwanese study examined the impacts of vitality acupunch exercise on older adults with possible sarcopenia, concluding that acupunch exercise has positive effects on the muscle mass, hand grip strength, and sleep quality of participants after a six-month intervention [14]. Furthermore, Pan et al. [15] designed a multicomponent intervention strategy consisting of nutrition, resistance exercise, and health education for community-dwelling Chinese seniors with possible sarcopenia, which increased their muscle mass and handgrip strength and decreased the duration of the timed up-and-go test and the five-times chair stand test. However, the proportion of non-pharmaceutical interventions for older individuals with possible sarcopenia (11.9%) was substantially lower than that for sarcopenia (72.9%) in the community [16].

Meanwhile, health education has received comparatively less attention in both fields of possible sarcopenia and sarcopenia prevention research. From a quantitative perspective, the total number of health education interventions (15.5%) is small when compared with exercise (52.8%) or nutrition interventions (34.5%) to prevent possible sarcopenia or sarcopenia in the community [16]. In terms of content design, the content of health education lacks pertinence to sarcopenia. A recent scoping review indicated that more than 80% of the educational materials promoted in health education interventions were not explicitly related to sarcopenia (e.g., preventing billing fraud, family conflicts, oral hygiene) [16]. This may be the primary cause for the unsatisfactory outcomes of current health education for sarcopenia prevention [3,16]. In addition, the intervention tools for health education are comparatively conventional. Only three traditional forms of health education to prevent possible sarcopenia or sarcopenia being identified, including group-based classes, face-to-face interactions and printed leaflets/materials [16].

Social media has become a promising platform for health education and behaviour change in prevention of some diseases in recent years, but there are no reports in the sarcopenic area. For instance, a recent study demonstrated that participation in a Twitter social media support group for breast cancer patients (of which 32.9% were between 55~74 years) increased overall breast cancer knowledge and decreased anxiety [17]. Another study determined that a video clip followed by a text post was the most effective method of informing hypertensive individuals about the primary prevention of cardiovascular diseases using the Instagram social media platform [18]. Facebook advertising has also been shown to be effective for disseminating hypertension knowledge to older adults in research; with the click-through rates for older (65 years or older) Chinese Americans higher than those for younger (45-54 years), at 15% versus 4% respectively [19]. In addition to knowledge dissemination, social media-based interventions are widely used in the promotion of positive behaviour change. A national web-based cross-sectional survey in China reported that social media, including TikTok,

WeChat and Weibo, was an effective tool to disseminate pandemic news and disease knowledge, and was also beneficial for promoting behaviours to prevent COVID-19 among the public [20]. A systematic review focusing on behaviour change interventions through social media found that a majority of studies reported positive outcomes and most of studies targeted either physical activity or a combination of behaviours that included physical activity (eg, physical activity, diet and nutrition, and weight loss or weight maintenance) [21]. Moreover, a rapid evidence-based review revealed that studies using social media in interventions have mostly showed superior results and suggest that public health institutions, clinicians, and other stakeholders consider the use of social media in their interventions targeting people affected with chronic disease [22].

Therefore, our research team co-created a social-media based health education plus exercise programme (SHEEP) for preventing possible sarcopenia through behaviour change in community-dwelling young-old adults [3, 23]. This programme constructed a SHEEP Conceptual Model primarily guided by the Behaviour Change Wheel (BCW) [24] and the conceptual model for Lifestyle-integrated Functional Exercise using smartphones and smartwatches (eLiFE) [25], with the objective of developing intervention content and monitoring process. Then, this programme co-designed a multicomponent intervention strategy based on the SHEEP Conceptual Model and identified the detailed content, frequency, intensity, and duration of the interventions using a social-media (TikTok) based approach. After the three-week preliminary test, the results from semi-structured interview indicated that the participants complied well with the SHEEP intervention strategy, and provided a positive feedback for both health education and exercise intervention. Not only did participants subjectively report that their grip and leg strength increased after exercise, they perceived that their mood, sleep, diet, and spirit also improved. Simultaneously, participants reported that the programme positively altered their attitudes and behaviours toward sarcopenia prevention, and that they would continue to exercise after the study was completed. They were also willing to recommend the program to others. Nevertheless, several improved outcomes were more subjective. To assure a more impartial assessment of the potential impact of the SHEEP intervention on the intended population, we devised this extended feasibility study prior to proceeding with a prospective RCT.

## **Study aims and objectives**

The main aim of this study is to assess the feasibility and acceptability of the SHEEP intervention to improve muscle function among young-old adults with possible sarcopenia in the community. According to the feasibility checklist created by Orsmond

and Cohn [26], the specific objectives of this research are: 1) assessing recruitment capability and sample characteristics; 2) assessing data collection procedures and outcome measurements; 3) assessing intervention and study procedures' acceptability and suitability; 4) assessing resources and the ability to manage and implement the study and intervention; and 5) assessing participant responsiveness to intervention.

## **Materials and methods**

### **Study design**

A single-arm prospective pre-post study will be conducted to evaluate the feasibility, acceptability, and preliminary impact of the SHEEP on the prevention of possible sarcopenia in community-dwelling young-old adults. In this ten-week intervention with nine-week follow-up study, both quantitative and qualitative methods will be employed to evaluate the outcomes. This research protocol was based on the Standard Protocol Items: Recommendations for Interventional Trials - 13 (SPRIT-13) checklists (S1 and S2 Files) and the Template for Intervention Description and Replication (TIDieR) checklist (S3 File).

### **Study setting**

This feasibility study will be conducted in Changsha, Hunan Province, China, with the assistance of our Chinese collaborators. The recruitment and intervention procedure will be carried out in two communities, including Sanchaji Community Health Service Centre and Guanshaling Community Health Service Centre.

### **Eligibility criteria**

Different scholars have different interpretations of the definition of young-old, like 60-69 or 65-74 [27, 28]. Based on the study shortage of 60-69 age group from our scoping review [16] and also considering this feasibility study will be carried out in China where ages 60+ are considered an older person [29-31], 60-69 years old is defined as young-old in this study. Trained and professional PI will be approaching older adults to take in this study and they will be using the inclusion and exclusion criteria to ensure that only people with the mental capacity to take part are included. The following inclusion and exclusion criteria will be considered for recruitment of participants:

- Inclusion criteria
- 1) 60~69 years old



- 2) Chinese residents living in the community
  - 3) Have a smart phone with internet connection at home, existing users of TikTok or have willingness to download and use TikTok
  - 4) Individuals with sarcopenia screening questionnaire: Five-item (strength, walking assistance, rising from a chair, stair-climbing, and falls) combined with calf circumference [SARC-CalF]  $\geq 11$  [2, 32]
  - 5) Individuals with possible sarcopenia, as defined by low Grip Strength [M:<28 kg, F:<18kg] in accordance with the 2019 Asian working group consensus on diagnosis criteria for sarcopenia [2]
  - 6) Be able to attend the community health centre (at their own expense if travel is required) on six occasions for the duration of the study
  - 7) Informed consent for screening and research
- Exclusion criteria
- 1) Unable to communicate or independently complete learning and exercise using TikTok
  - 2) Serious or unstable medical illness, such as severe cardiovascular or respiratory conditions, mental disorder, dementia, etc.
  - 3) Currently undertaking regular exercise (e.g. Tai Chi and Square Dance) and exercise intensity is moderate ( $\geq 150$ mins/week)
  - 4) Contraindications for the use of Bioelectrical Impedance Analysis (BIA), such as people with implanted cardiac pacemakers, or other electronic devices or metal grafts, or with significant pitting oedema, or with limb dysfunction or body paralysis, or while taking medications that affect body composition, such as diuretics or glucocorticoids.

### **Recruitment, consent and withdrawal**

First, the recruitment process will be conducted within the two collaborative health centre communities. The principle investigator (PI) will visit the two community health centres to present this research to managers and get the approval of the managers. Then PI will explain the eligibility criteria on the information leaflets to managers, so that the managers can identify who to give information leaflets to.

Second, the PI will provide the managers with information leaflets, and they will assist in distributing the information leaflets to older population who visit the community health centres. Besides, the PI will also send electronic recruitment leaflets to community WeChat groups through the assistance of managers. When distributing information leaflets, managers will reassure the older adults that their participation is entirely voluntary and they are under no obligation to take part, and their non-participation will not affect their access to other services at the health service centre.

Third, if older adults are interested in this study after reviewing the leaflet, they

can give the managers their contact details and the managers will email them to the PI, and the PI will then contact these older adults. Alternatively, they can contact the PI directly via the email address or telephone number listed on the leaflet.

Fourth, to reduce risk of participants coming to meet with the PI unnecessarily, the PI will conduct a preliminary eligibility screening over phone/email (e.g. confirm items 1-3 and 6 on eligibility list, and exclusion criteria). Participants will be made aware during this call/email communication that it is possible they will not be eligible based on additional criteria that can only be assessed in person and they are under no obligation to meet with the PI if it is not convenient for them.

Fifth, if confirmed, the PI will invite the participant to meet with them in an office provided by the community health centre to tell them more about the study and determine whether or not they are eligible based on items 4 and 5 (SARC-CalF and grip strength). If participants are not eligible based on these criteria they will be given their scores and an explanation of what that means which will be useful information for them.

Sixth, potential participants who meet the eligibility requirements will be provided with a full explanation of research that informs them of the detailed research content, the confidentiality of personal information, the potential benefits, the potential risks, and a coping strategy for the risks, should they wish to know. A Participant Information Sheet will be provided to subjects who are still interested and willing to participate in the study, and time will be allowed for consideration (at least 24 hours).

Finally, those who agree to participate in the study will be required to provide (written or verbal) informed consent (face-to-face or through phone calls) prior to data collection. If participants choose verbal consent, the PI will read each statement of the consent form and request their response via a dedicated mobile phone. Verbal consent will be separately recorded and stored.

## **Research ethics**

This study has been approved by the University of Manchester Research Ethics Committee (Project ID: 2024-19302-34066), and permissions have already been granted by collaborators in the Community Nursing Department of Xiang Ya Nursing School, Central South University, China.

## **Sample size**

One arm of 35 eligible participants will be needed and recruited. A sample size of 30 participants after attrition (attrition rate 10%~15%) is normally used for a feasibility study [33, 34]. Purposive sampling will be utilized in this research. The target population in the two communities will be divided into four categories based on age (60-65 and 66-69 years) and gender (male and female), to determine if there are differences in the acceptability of the intervention process among subgroups of

individuals.

### **Randomisation, allocation, and blinding**

This study is a one-arm pre-post feasibility study, so randomization and allocation are not required at this time. A cluster RCT is planned for the future, so there is no need to evaluate the feasibility of individual randomization. As there is only one arm and the intervention contents include health education, which can be readily distinguished by researchers and participants when the intervention begins, a blinded intervention process is not appropriate.

### **Intervention**

Participants will receive the SHEEP intervention strategy [23], which consists of one-week health education and six-week exercise. Participants will be required to view a total of seven health education videos posted on TikTok in the first week, including the following: 1) What is sarcopenia? 2) What are the common influence factors of sarcopenia? 3) What are the adverse effects of sarcopenia? 4) What are the manifestations of sarcopenia in life? 5) What are the common screening methods for sarcopenia? 6) What are the exercise methods to prevent sarcopenia? 7) What are the nutritional methods to improve sarcopenia?. Each video lasts four to six minutes. There is no restriction on the number of views, so participants are allowed to determine the number of videos per day.

Participants will attend a six-week exercise training on TikTok following completion of the health education learning. The duration of the exercise is fixed at 30 minutes and comprises four types of exercise: 3-minute warm-up training, 8-minute aerobic training, 16-minute resistance training, and 3-minutes flexibility training. The multicomponent exercise training informed by the evidence-based FaME exercise programme (<https://fameexercise.com/>), OTAGO exercise programme (<https://www.med.unc.edu/aging/cgwep/courses/otago-exercise-program/>), and our previous study about intervention development which involved collaboration from stakeholders (physicians, nurses, physiotherapists, older participants) [23]. The training is delivered through TikTok videos. The frequency of exercise must be at least 3 times/week, and participants can increase the frequency of training per week based on their own situation. The overall exercise intensity is moderate. The resistance exercise is performed using two 500ml or 1000ml or 1500ml or 2000ml capacity water-bottles. Participants can start from 500ml or 1000ml, then adding 100-500ml of weight every three weeks. The increase in weight is not fixed, which can be adjusted according to the actual situation. When the body feels no burden after the whole exercise, for instance the body does not heat, sweat or muscles do not appear slightly sore after exercise, we suggest appropriately increasing the weight. These water bottles are all made of plastic. 500ml

and 1000ml water bottles are more common in mineral water bottles or juice bottles, while 1500ml and 2000ml water bottles are more common in sports water bottles.

Finally, participants will be followed up for six weeks. The researcher will help them record their exercise diary and feeling through a short telephone call or text message each week.

## **Outcomes**

As this is a small feasibility study, the main aim is to assess the feasibility and acceptability of the entire research process, from recruitment to the delivery of the intervention and the use of the outcome measurements. The secondary objectives are to compare standard measures at baseline, seven-week post-intervention, and six-week follow-up for muscle-related outcomes, other body measurements as detailed below, and study adherence in order to evaluate the potential efficacy of the intervention. The outcome measures will be collected at different time points to identify an appropriate primary outcome, and estimate parameters for a sample size calculation for an RCT in the future. Final semi-structured interviews with all participants will be conducted to investigate the intervention's and study procedures' viability in greater detail.

### **• Primary aim**

Evaluate the practicability and acceptability of the research procedures, including:

(1) Assessing recruitment capability and participant characteristics: Recording recruitment process including participant numbers screened, eligible, approached, consented, and excluded after screening; then calculating the relevant rates.

(2) Assessing intervention and study procedures' acceptability and suitability: 1) Participants' evaluation of the intervention and study procedures; 2) Whether the rationale for participant dropout is associated with the intervention and study procedures; 3) Participants adherence to the intervention including the compliance rate for completion of the entire study, health education, and exercise, respectively; 4) Follow-up rate = Number of participants who complete the follow-up stage / Number of participants who complete the six-week exercise.

(3) Assessing data collection procedures and outcome measurements: 1) Time needed to collect data; 2) Experiences of the secondary outcome measures, such as whether they feel fatigued or burdened.

(4) Assessing resources and the ability to conduct the study and intervention: 1) Duration of time required to complete each step of this study; 2) Ability to complete the study within the allotted time; 3) Capacity of researchers to collaborate with community healthcare professionals; 4) Evaluate researchers' data organization, management, and analysis ability.

(5) Assessing participant responsiveness to intervention: 1) Investigate subjective

experiences of the participants during the intervention; 2) Measure objective outcomes before and after intervention.

• *Secondary outcomes*

Table 1 outlines the two types of secondary outcomes that will be evaluated at various points throughout the study. The first category consists of muscle-related outcomes, including muscle strength, muscle mass, and physical performance. The second category includes additional body parameters such as anthropometric indices, nutrition state, perceived knowledge, personal motivation, behavioural skills, and monitoring of behaviour change. The questionnaire survey, like MNA-SF, SEMCD-6, and the Self-Management for Chronic Disease Scale, will be conducted after the physical measurements are assessed. The PI will ask participants the questionnaire questions verbally and will record their answers electronically. If participants wish to see the questionnaires, they will be provided with a paper copy. Those measurements take about 30-40 minutes in total to complete, which will be assessed in an office provided by the community health centre.

Table 1. Overview of instruments and time of outcome measures

| MEASURES                                          | INSTRUMENTS                                                                               | TIMEPOINT      |                |                |                |                 |                 |
|---------------------------------------------------|-------------------------------------------------------------------------------------------|----------------|----------------|----------------|----------------|-----------------|-----------------|
|                                                   |                                                                                           | T <sub>0</sub> | Intervention   |                |                | Follow-up       |                 |
|                                                   |                                                                                           |                | T <sub>1</sub> | T <sub>4</sub> | T <sub>7</sub> | T <sub>10</sub> | T <sub>13</sub> |
| Social-demographic information                    | Demographics questionnaire (Self-developed)                                               | ×              |                |                |                |                 |                 |
| <b>Primary outcome</b>                            |                                                                                           |                |                |                |                |                 |                 |
| Feasibility and acceptability                     | Research record sheet (Self-developed)                                                    | ●              |                |                |                |                 | ▶               |
| <b>Secondary outcome</b>                          |                                                                                           |                |                |                |                |                 |                 |
| Handgrip strength                                 | Digital hand-held dynamometer                                                             | ×              |                | ×              | ×              | ×               | ×               |
| Anthropometric measurements (e.g. weight, height) | Stadiometer + Scale + Plastic tape                                                        | ×              |                | ×              | ×              | ×               | ×               |
| Body composition (e.g. muscle mass, body fat)     | Bioelectrical impedance analyzer device                                                   | ×              |                | ×              | ×              | ×               | ×               |
| Physical performance                              | 4-Meter Walk Test                                                                         | ×              |                | ×              | ×              | ×               | ×               |
|                                                   | Five Times Sit to Stand Test                                                              | ×              |                | ×              | ×              | ×               | ×               |
| Nutrition state                                   | Mini-Nutritional Assessment Short Form                                                    | ×              |                | ×              | ×              | ×               | ×               |
| Perceived knowledge                               | 21 true or false quizzes related to sarcopenia (Self-developed)                           | ×              | ×              | ×              | ×              | ×               | ×               |
| Personal motivation                               | Self-efficacy for Managing Chronic Disease 6-item Scale                                   | ×              |                | ×              | ×              | ×               | ×               |
| Behavioural skills                                | Self-management Behaviour for Chronic Disease Scale                                       | ×              |                | ×              | ×              | ×               | ×               |
| Behaviour change monitoring                       | Exercise diary (Self-developed)                                                           | ●              |                |                |                |                 | ▶               |
|                                                   | Exercise Adherence Rating Scale (EARS)                                                    | ×              |                | ×              | ×              | ×               | ×               |
|                                                   | Records of viewing and sharing sarcopenia-related information (Self-developed)            | ●              |                |                |                |                 | ▶               |
|                                                   | Willingness to formulate habits of regular exercise (Self-developed)                      | ×              |                | ×              | ×              | ×               | ×               |
|                                                   | Records of exposure percentage of exercise and sarcopenia related videos (Self-developed) | ×              |                | ×              | ×              | ×               | ×               |

Note: T<sub>0</sub> = baseline; T<sub>1</sub> = 1-week post-intervention; T<sub>4</sub> = 4-week post-intervention; T<sub>7</sub> = 7-week post-intervention; T<sub>10</sub> = 3-week follow-up; T<sub>13</sub> = 6-week follow-up.

• *Handgrip strength*

Handgrip strength (kg) will be measured with a digital hand-held dynamometer (EH101, Xiangshan Inc, Guangdong, China). In a seated position with the elbow flexed at 90 degrees, the shoulder attached to the thorax, and the wrist in a neutral position (0 degrees), the maximal grip strength is measured. The measurements are taken three times on each side (left and right), with a 30-second interval between each assessment [35].

· *Anthropometric measurements*

Height will be measured to the nearest 0.1 cm using a stadiometer, and the weight will be measured to the nearest 0.1 kg using a scale. The calf circumference and abdominal circumference will also be measured using a tape measure at two legs and the navel, respectively, to the nearest 0.1 cm.

· *Body composition*

Body composition measurement will be conducted using a multi-frequency bioelectrical impedance analyzer device (InBody S10; Biospace, Seoul, Korea) according to the manufacturer's guidelines. BIA calculates body composition by comparing the conductivity of various tissues based on their distinct biological properties. As a cell approaches an ideal spherical shape, its conductivity decreases, as it is proportional to water content and, more specifically, electrolytes. Due to the fact that adipose tissue is composed of round-shaped cells and contains relatively little water in comparison to other tissues such as muscle, the conductivity of the body will decrease as body fat increases. In order to conduct a multi-segment frequency analysis, electrodes are set at six precise tactile-points of the body. Using six different frequencies (1 kHz, 5 kHz, 50 kHz, 250 kHz, 500 kHz, 1000 kHz), more than 30 impedance measurements are obtained from the right and left arms, trunk, and right and left legs [36]. The following body index parameters will be chosen for analysis in this study: skeletal muscle mass (kg), skeletal mass index ( $\text{kg}/\text{m}^2$ ), upper-extremity skeletal muscle mass (kg), lower-extremity skeletal muscle mass (kg), trunk skeletal muscle mass (kg), body fat (kg), body fat percentage (%), body mass index ( $\text{kg}/\text{m}^2$ ), protein (kg), and bone mineral (kg).

· *Physical performance*

The physical performance will be measured by using a 4-Meter Walk Test (4-MWT, m/s) and a Five Times Sit to Stand Test (FTSST, s).

First, the participants' self-selected walking speed will be measured using a 4-MWT (with 2m for acceleration/ deceleration) [37]. At the beginning and end of the timed walkway, space will be provided for participants to accelerate and decelerate outside of the data collection area to reduce gait variability introduced during these



phases. Participants will be instructed to "walk at a comfortable, normal pace" until reaching the end of the marked path; and each participant must accomplish three consecutive measurements. A researcher will measure walking time using a stopwatch (ZSD-013, China), starting it when the participant's lead leg crosses the first marker and stopping it when it crosses the second marker. To prevent interobserver variation, all stopwatch measurements will be conducted by the same researcher. Throughout the testing session, participants will be provided rest breaks as required.

Second, participants will sit on an armless chair with a 43 cm (cm) seat height to commence the FTSSST [38]. Each participant will be instructed to sit with their back against the chair's backrest and their arms crossed over their torso. The researcher will then demonstrate the proper technique for performing the test, including coming to a full stand, which is defined as an upright trunk with extended hips and knees. A researcher will measure the time using a stopwatch (ZSD-013, China). Timing will commence when the researcher says "go" and end when the participant's glutes touch the seat after the fifth stand [39]. The participants must stand and sit five times "as quickly as possible" and without physical assistance. The researcher will not use encouraging words or body language to encourage participants to speed up their performance.

· *Nutrition state*

The Mini-Nutritional Assessment Short Form (MNA-SF), a valid nutritional screening instrument applicable to geriatric health care professionals, will be used to evaluate nutritional status [40]. The MNA-SF consists of six items and one anthropometric measurement (either body mass index [BMI] or calf circumference [CC]) to identify individuals at risk of malnutrition. Maximum MNA-SF score is 14, with scores  $\leq 11$  indicating possible malnutrition and scores  $\geq 12$  confirming normal nutritional status [41]. MNA-SF appears to combine the predictive power of Full-MNA with an assessment period that is sufficiently brief [40, 42].

· *Perceived knowledge*

Participants' perceived knowledge of sarcopenia prevention will be assessed by using the 21 true or false questions designed during the intervention development phase of this study. The 21 quizzes reflect the main points of the seven topics in the sarcopenia prevention health education strategy. Final evaluation of the participants' mastery of health education knowledge will be based on the proportion of correct responses. These sarcopenia quizzes were developed in our previous study [23], which were developed by the researchers according to the literatures first, followed by two rounds of PPI consultations (eight older adults, four sarcopenia and health education experts) and two rounds of focus group interviews (31 older adults with possible sarcopenia). All these

stakeholders reviewed and approved the content of the questions which lends itself to content validity.

· *Personal motivation*

Self-Efficacy for Managing Chronic Disease 6-item Scale (SEMCD-6) developed by the Stanford Patient Education Research Centre in a Chronic Disease Self-Management Program will be used to identify and measure the confidence level of older adults in adopting appropriate behavioural skills to prevent and manage chronic disease [43, 44]. Scores on this scale are calculated as the mean of the six items, including self-efficacy to manage symptoms (4 items) and self-efficacy to manage disease (2 items), each measured on Likert scales ranging from 1 (not at all confident) to 10 (totally confident). The higher the score, the greater the participant's confidence in completing the disease management mission. Measures of SEMCD-6 reliability have been found to be high ( $= 0.91$ ), and test-retest reliability has been reported to be statistically significant ( $r = 0.87$ ).

· *Behavioural skills*

Self-management Behaviour for Chronic Disease Scale also developed by the Stanford Patient Education Research Centre will be used to identify and measure older adults' actual behavioural skills in daily life for preventing and managing chronic disease [43-45]. The scale includes exercise management (5 items), cognitive symptom management (6 items) and communication with physicians (3 items). Exercise management is measured by examining the total time spent engaging in physical activities, such as stretching and strengthening exercises, walking, swimming, bicycling, and aerobics (categorized respectively as 0: none, 1: <30min/ week, 2: 30-60min/week, 3: 1-3h, or 4: >3h/week). Cognitive symptom management is measured on a 6-point Likert scale, ranging from never to always, and includes distraction, progressive muscle relaxation, imagery, positive thinking, and self-distance. Communication with physicians is measured as the number of times the participants prepared a list, asked questions, and discussed problems with the provider on a 6-point Likert scale ranging from never to always.

· *Behaviour change monitoring*

Three aspects of behaviour change will be monitored throughout the entire research procedure, including: 1) Exercise adherence during intervention and follow-up periods will be calculated by completion rate of minimum exercise required in the study. The Exercise Adherence Rating Scale (EARS) is a validated 16-question instrument with a 6-question subscale assessing adherence; the remaining questions measure reasons for adherence/non-adherence. As stated in the study [46], the EARS



is a valid and reliable tool that allows for the assessment of compliance with suggested home exercise. The six items comprise a unidimensional scale that exhibited favourable measurement features, including satisfactory internal consistency and strong test-retest reliability. 2) Percentage of participants who actively view and share sarcopenia-related information to others. 3) Percentage of participants willing to formulate habits of regular exercise to prevent sarcopenia at the end of the current study. 4) Exposure percentage of exercise and sarcopenia related videos = Number of viewing exercise and sarcopenia related videos / Twenty videos. TikTok can push videos to users that they are interested in based on big data algorithms; therefore, if participants begin to view more videos about exercises and sarcopenia after health education in our research, TikTok will capture these changes in their viewing habits and push more videos about exercises and sarcopenia to them. Then, researchers can record the number of exercise and sarcopenia-related videos when every twenty videos are viewed on participants' TikTok and observe the exposure percentage of exercise and sarcopenia-related videos to determine if participants' video-scrolling behaviour changes.

· *Social-demographic information*

The participants will respond to single-item questions regarding their age in years, gender, long-term condition, medication, level of education, and any significant health issues that may impact their ability to engage in physical activity, as well as whether or not they use a mobility aid.

· *Qualitative Interview*

After the six-week follow-up period, all participants, including those who withdraw at any point, will be offered a semi-structured interview in an office provided by the community health centre to assess their experiences with the intervention and research process. This will take about 30min. Family members/ caregivers may also be invited to the interview at the request of the participant.

## **Timeline**

This will be a 17-week study, including 2-week recruitment, 1-week health education, 6-week exercise intervention, 6-week follow up, and 2-week interview. The expected completion date for the research is between May 2024 and September 2024. The recruitment phase will last approximately ten days because, during the intervention development phase, our research group collaborated with medical personnel at community health service centres and gained experience in recruitment. Figure 1 illustrates the comprehensive research procedure and precise timetable.

**Fig 1. A brief diagram of the feasibility study procedure and timeline.**

## Data collection and analysis

The PI will be responsible for data collection, who already accepted qualified training and was experienced with all the measurements in this research. To promote the collection of high-quality data, the PI will double-check the collected data, and a statistician will examine the range of values.

As for quantitative data analysis, descriptive statistics will be utilised to summarise the percentage of recruitment, baseline participant characteristics (e.g. age, gender, and educational background), attrition rate, compliance rate, height, weight, etc. Paired-sample T test will be utilised to determine the difference between the mean values of secondary outcomes before and after intervention, such as handgrip strength, skeletal muscle mass, body fat, etc. All statistical analyses will be conducted using SPSS Statistics 27.0 (IBM Corp., Armonk, NY, USA). P Values <0.05 will be interpreted as indicating significance.

Regarding the collection of qualitative data, all face-to-face semi-structured interviews after follow-up period will be audio recorded using an encrypted digital recorder. If participants prefer a telephone interview, the conversation will be recorded on an encrypted dictaphone. All encrypted recordings will be uploaded to a secure server at the University of Manchester and then deleted from the recording device. Moreover, each interview will last between 30 minutes and one hour, and participants will only be asked to participate in one. During data analysis stage, we will analyse the qualitative data based on thematic analysis method. Qualitative data will be transcribed verbatim and potentially identifying information will be removed. The transcripts will be compared to the original recordings, corrected as needed, and anonymized. To become familiar with qualitative data, researchers must first read all transcripts. Themes will be developed based on the interview guide and research team discussion in order to identify the key characteristics of the qualitative data. Then, codes will be generated for each line of each transcript and categorised accordingly. Before finalising the major themes, each category must be re-evaluated and scrutinised, and groups of major categories will be refined. Two researchers will perform and review the coding process to ensure a double check, followed by a discussion to ensure the validity of the data. To increase the transparency of the interpretation, the Chinese-to-English and English-to-Chinese translation of quotations will be performed in this study. QSR International's NVivo 12 qualitative analysis software will be used to assist and facilitate the coding and analysis process. We will refer to the theoretical standpoints from the SHEEP Conceptual Model [23], the BCW [24] and the conceptual model for eLiFE [25] when analysing the qualitative data in this study.

## **Data management**

The principal investigator will preserve the confidentiality of participants taking part in the study and fulfil transparency requirements under the General Data Protection Regulation for health and care research. Data and all appropriate documentation will be confidentially and securely stored for a minimum of 10 years after the completion of the study, including the follow-up period.

## **Study monitoring**

The principal investigator will oversee participant recruitment, intervention and follow-up stage. In addition, one community leader in each cooperative community health centre will assume overall responsibility for participant identification and recruitment. One team comprised of research professionals from the United Kingdom and China will be responsible for ensuring the overall quality of research data. All principal researchers will hold a monthly online meeting to report on the project's progress and discuss its problems and solutions. A thorough risk assessment has been conducted, and potential patient, organisational, and study hazards, as well as their likelihood of occurrence and potential consequences, have been considered.

## **Discussion**

This research aims to test the feasibility and acceptability of a social-media based multicomponent intervention (health education + exercise) for community young-old adults with possible sarcopenia. Utilizing a mixed-methods approach will enable the investigation of barriers and facilitators to a successful implementation of the intervention, in order to adequately prepare for the future implementation of a randomized controlled trial. Additionally, based on quantitative data analysis, this study will be the first to observe the potential impact trend of a social-media intervention on the awareness and behaviour change of older individuals in preventing sarcopenia, with the ultimate goal of enhancing their muscle performance.

However, there are still some limitations in this research. First of all, this study lacks a control group, making it challenging to eliminate the influence of confounding factors. In order to tackle this issue, a future RCT will be required. Secondly, this study will recruit samples from only two communities, potentially leading to a sample that is not adequately representative. Enhancing the representativeness of future studies can be achieved by expanding the recruitment area. Thirdly, the exercise design failed to incorporate older persons who depend on mobility aids such as wheelchairs or crutches.

Future study could explore the creation of customized exercise programs for this specific demographic. Fourthly, this study will exclude older people who do not have Internet access. Therefore, exploring the possibility of integrating both online and offline interventions to prevent sarcopenia is also an innovation area in the future.

The findings of this study will be presented in peer-reviewed journals and scientific conferences, as well as be shared through a series of public engagement events including webinars.

The anonymised participant level dataset will not be publicly available but will be available from the principal investigator upon reasonable request.

Amendments to the protocol, study design or supporting documents will be approved by the University of Manchester Research Ethics Committee prior to implementation. All documents will be maintained with version number and tracked changes.

## Supporting information

**S1 File. SPIRIT 2013 checklist. (PDF)**

**S2 File. Example template of recommended content for the schedule of enrolment, interventions, and assessments. (PDF)**

**S3 File. TIDieR checklis. (PDF)**

## References

- [1] Cruz-Jentoft AJ, Bahat G, Bauer J, Boirie Y, Bruyère O, Cederholm T, et al. Sarcopenia: revised European consensus on definition and diagnosis. *Age Ageing*. 2019; 48(1):16-31. doi:10.1093/ageing/afz046
- [2] Chen LK, Woo J, Assantachai P, Auyeung TW, Chou MY, Iijima K, et al. Asian working group for sarcopenia: 2019 consensus update on sarcopenia diagnosis and treatment. *J Am Med Dir Assoc*. 2020; 21(3): 300-307 e302. doi:10.1016/j.jamda.2019.12.012
- [3] Shi Y, Stanmore E, McGarrigle L, Todd C. Social-media based Health Education plus Exercise Programme (SHEEP) to improve muscle function among community-dwelling young-old adults with possible sarcopenia in China: A study protocol for intervention development. *PLoS One*. 2024;19(3):e0286490. doi:10.1371/journal.pone.0286490
- [4] Pérez-Sousa MÁ, Pozo-Cruz JD, Cano-Gutiérrez CA, Izquierdo M, Ramírez-Vélez R. High prevalence of probable sarcopenia in a representative sample from Colombia: Implications for geriatrics in Latin America. *J Am Med Dir Assoc*. 2021; 22(4):859-864.e1. doi:10.1016/j.jamda.2020.10.021
- [5] Yao J, Wang Y, Yang L, Ren M, Li L, Wang H. Prevalence of possible sarcopenia in community-dwelling older Chinese adults: a cross-sectional study. *BMJ Open*. 2022;12(12): e067 425. doi:10.1136/bmjopen-2022-067425

- [6] Chen Z, Ho M, Chau PH. Prevalence, incidence, and associated factors of possible sarcopenia in community-dwelling Chinese older adults: A population-based longitudinal study. *Front Med (Lausanne)*. 2022; 8:769708. doi:10.3389/fmed.2021.769708
- [7] Wu X, Li X, Xu M, Zhang Z, He L, Li Y. Sarcopenia prevalence and associated factors among older Chinese population: Findings from the China Health and Retirement Longitudinal Study. *PLoS One*. 2021; 16(3):e0247617. doi:10.1371/journal.pone.0247617
- [8] Wang J, Liu C, Zhang L, Liu N, Wang L, Wu J, et al. Prevalence and associated factors of possible sarcopenia and sarcopenia: findings from a Chinese community-dwelling old adults cross-sectional study. *BMC Geriatr*. 2022;22(1):592. doi:10.1186/s12877-022-03286-y
- [9] Sun J, Yuan W, Chen M, Chen Y, Xu D, Li Z, et al. Possible sarcopenia and its risk factors in a home for seniors in Shanghai. *Asia Pac J Clin Nutr*. 2023;32(1):70-76. doi:10.6133/apjcn.202303\_32(1).0011
- [10] Erbas Sacar D, Kılıc C, Oren MM, Erdogan T, Ozkok S, Ozer Aydın C, et al. Probable sarcopenia: associations with common geriatric syndromes and comorbidities in Turkish geriatric patients from a university hospital. *Eur Geriatr Med*. 2022;13(6):1299-1308. doi:10.1007/s41999-022-00691-9
- [11] Lee JD, Lee JH. Association between Possible Sarcopenia and Depressive Symptoms in Korean Older Adults: Results from the Korea National Health and Nutrition Examination Survey in 2018. *Korean J Fam Med*. 2023;44(3):143-150. doi:10.4082/kjfm.22.0145
- [12] Merchant RA, Chan YH, Hui RJY, Lim JY, Kwek SC, Seetharaman SK, et al. Possible sarcopenia and impact of dual-task exercise on gait speed, handgrip strength, falls, and perceived health. *Front Med (Lausanne)*. 2021;8:660463. doi:10.3389/fmed.2021.660463
- [13] Jones C, Chen KM, Weeks B, Qi M, Moyle W. Healthy Beat Acupunch exercise program: Validation and feasibility study for older adults with reduced physical capacity or probable sarcopenia. *Explore (NY)*. 2021;17(6):498-504. doi:10.1016/j.explore.2020.05.010
- [14] Tung HT, Chen KM, Chou CP, Belcastro F, Hsu HF, Kuo CF. Acupunch Exercise Improved Muscle Mass, Hand Grip Strength, and Sleep Quality of Institutional Older Adults with Probable Sarcopenia. *J Appl Gerontol*. 2023;42(5):888-897. doi:10.1177/07334648221141413
- [15] Pan WM, Huang G, Wang B, Han YB, He CM, Li AP. Effects of integrated intervention on muscle mass and physical functions in the elderly individuals with possible sarcopenia in a community hospital. *Chin J Mult Organ Dis Elderly*. 2022; 21(2): 95-99. doi:10.11915/j.issn.1671-5403.2022.02.021
- [16] Shi Y, Tang Y, Stanmore E, McGarrigle L, Todd C. Non-pharmacological interventions for community-dwelling older adults with possible sarcopenia or sarcopenia: a scoping review. *Arch Gerontol Geriatr*. 2023;112:105022. doi:10.1016/j.archger.2023.105022
- [17] Attai DJ, Cowher MS, Al-Hamadani M, Schoger JM, Staley AC, Landercasper J. Twitter Social Media is an Effective Tool for Breast Cancer Patient Education and Support: Patient- Reported Outcomes by Survey. *J Med Internet Res*. 2015;17(7):e188. doi:10.2196/jmir.4721
- [18] Bezzubtseva MV, Demkina AE, Lipilina MN, Benimetskaya KS, Pivenstein AL, Gavriluk N D, et al. Video or text? Education through a social media website in hypertension. *Int J Cardiol Cardiovasc Risk Prev*. 2022;14:200139. doi:10.1016/j.ijcrp.2022.200139
- [19] Dunn PH, Woo BKP. Facebook advertising for disseminating hypertension knowledge to older Chinese adults. *J Hypertens*. 2018;36(4):962. doi:10.1097/HJH.0000000000001668

- [20] Li X, Liu Q. Social Media Use, eHealth Literacy, Disease Knowledge, and Preventive Behaviours in the COVID-19 Pandemic: Cross-Sectional Study on Chinese Netizens. *J Med Internet Res*. 2020; 22(10):e19684. doi:10.2196/19684
- [21] Elaheebocus SMRA, Weal M, Morrison L, Yardley L. Peer-Based Social Media Features in Behaviour Change Interventions: Systematic Review. *J Med Internet Res*. 2018;20(2):e20. doi:10.2196/jmir.8342
- [22] Gabarron E, Årsand E, Wynn R. Social Media Use in Interventions for Diabetes: Rapid Evidence-Based Review. *J Med Internet Res*. 2018;20(8):e10303. doi:10.2196/10303
- [23] Shi Y, Stanmore E, McGarrigle L, Wang XH, Wang XQ, Li YH, Todd C. Intervention development for a social-media based health education plus exercise programme (SHEEP) to improve muscle function among young-old adults with possible sarcopenia in the community: Co-design Approach. *Maturitas*, 2024. (Under review)
- [24] Michie S, van Stralen MM, West R. The behaviour change wheel: a new method for characterising and designing behaviour change interventions. *Implement Sci*. 2011; 6:42. doi:10.1186/1748-5908-6-42
- [25] Boulton E, Hawley-Hague H, French DP, Mellone S, Zacchi A, Clemson L, et al. Implementing behaviour change theory and techniques to increase physical activity and prevent functional decline among adults aged 61-70: The PreventIT project. *Prog Cardiovasc Dis*. 2019; 62(2): 147-156. doi:10.1016/j.pcad.2019.01.003
- [26] Orsmond GI, Cohn ES. The Distinctive Features of a Feasibility Study: Objectives and Guiding Questions. *OTJR (Thorofare N J)*. 2015;35(3):169-177. doi:10.1177/1539449215578649
- [27] Forman DE, Berman AD, McCabe CH, et al. PTCA in the elderly: The "young-old" versus the "old-old". *Journal of the American Geriatrics Society* 1992; 40 (1): 19-22.
- [28] Zizza CA, Ellison KJ, Wernette CM. Total Water Intakes of Community-Living Middle-Old and Oldest-Old Adults. *The Journals of Gerontology Series A: Biological Sciences and Medical Sciences* 2009; 64A (4): 481-486.
- [29] Kowal P, Dowd JE. Definition of an older person. Proposed working definition of an older person in Africa for the MDS Project. Geneva: World Health Organization 2001.
- [30] Orimo H, Ito H, Suzuki T, et al. Reviewing the definition of "elderly". *Geriatrics & Gerontology International* 2006; 6(3): 149-158.
- [31] Ouchi Y, Rakugi H, Arai H, et al. Redefining the elderly as aged 75 years and older: Proposal from the Joint Committee of Japan Gerontological Society and the Japan Geriatrics Society. *Geriatr Gerontol Int* 2017; 17: 1045-1047.
- [32] Huang L, Shu X, Ge N, Gao L, Xu P, Zhang Y, et al. The accuracy of screening instruments for sarcopenia: a diagnostic systematic review and meta-analysis. *Age Ageing*. 2023; 52(8): afad152. doi:10.1093/ageing/afad152
- [33] Lancaster GA, Dodd S, Williamson PR. Design and analysis of pilot studies: recommendations for good practice. *J Eval Clin Pract*. 2004; 10(2):307-312. doi:10.1111/j.2002.384.doc.x
- [34] Hertzog MA. Considerations in determining sample size for pilot studies. *Res Nurs Health*. 2008; 31(2):180-191. doi:10.1002/nur.20247
- [35] Ha YC, Yoo JI, Park YJ, Lee CH, Park KS. Measurement of Uncertainty Using Standardized Protocol of Hand Grip Strength Measurement in Patients with Sarcopenia. *J Bone Metab*. 2018; 25(4):243-249. doi:10.11005/jbm.2018.25.4.243



- [36] Buckinx F, Reginster JY, Dardenne N, Croisier JL, Kaux JF, Beaudart C, et al. Concordance between muscle mass assessed by bioelectrical impedance analysis and by dual energy X-ray absorptiometry: a cross-sectional study. *BMC Musculoskelet Disord*. 2015; 16:60. doi:10.1186/s12891-015-0510-9
- [37] Peters DM, Fritz SL, Krotish DE. Assessing the reliability and validity of a shorter walk test compared with the 10-Meter Walk Test for measurements of gait speed in healthy, older adults. *J Geriatr Phys Ther*. 2013; 36(1):24-30. doi:10.1519/JPT.0b013e318248e20d
- [38] Wallmann HW, Evans NS, Day C, Neelly KR. Interrater Reliability of the Five-Times- Sit-to- Stand Test. *Home Health Care Manag Pract*. 2012; 25:13-27. doi: 10.1177/108482231245 3047.
- [39] Duncan RP, Leddy AL, Earhart GM. Five times sit-to-stand test performance in Parkinson's disease. *Arch Phys Med and Rehabil*. 2011; 9:1431-1436. doi: 10.1016/j.apmr.2011.04.008.
- [40] Kaiser MJ, Bauer JM, Ramsch C, Uter W, Guigoz Y, Cederholm T, et al. Validation of the Mini Nutritional Assessment short-form (MNA-SF): a practical tool for identification of nutritional status. *J Nutr Health Aging*. 2009;13(9):782-788. doi:10.1007/s12603-009-0214-7
- [41] Suzana S Jr, Siti Saifa H. Validation of nutritional screening tools against anthropometric and functional assessments among elderly people in selangor. *Malays J Nutr*. 2007; 13(1):29-44.
- [42] Donini LM, Poggiogalle E, Molino A, Rosano A, Lenzi A, Rossi Fanelli F, et al. Mini-Nutritional Assessment, Malnutrition Universal Screening Tool, and Nutrition Risk Screening Tool for the Nutritional Evaluation of Older Nursing Home Residents. *J Am Med Dir Assoc*. 2016; 17(10):959.e11-959.e9.59E18. doi:10.1016/j.jamda.2016.06.028
- [43] Lorig KR, Sobel DS, Stewart AL, Brown BW, Jr Bandura A, Ritter P, et al. Evidence suggesting that a chronic disease self-management program can improve health status while reducing hospitalization: a randomized trial. *Med Care*. 1999; 37(1):5-14. doi:10.1097/00005650 - 199901000-00003
- [44] Lorig KR, Sobel DS, Ritter PL, Laurent D, Hobbs M. Effect of a self-management program on patients with chronic disease. *Eff Clin Pract*. 2001; 4(6):256-262.
- [45] Farrell K, Wicks MN, Martin JC. Chronic disease self-management improved with enhanced self-efficacy. *Clin Nurs Res*. 2004;13(4):289-308. doi:10.1177/1054773804267878
- [46] Newman-Beinart NA, Norton S, Dowling D, Gavriloff D, Vari C, Weinman JA, et al. The development and initial psychometric evaluation of a measure assessing adherence to prescribed exercise: the Exercise Adherence Rating Scale (EARS). *Physiotherapy*. 2017; 103(2):180-185. doi:10.1016/j.physio.2016.11.001

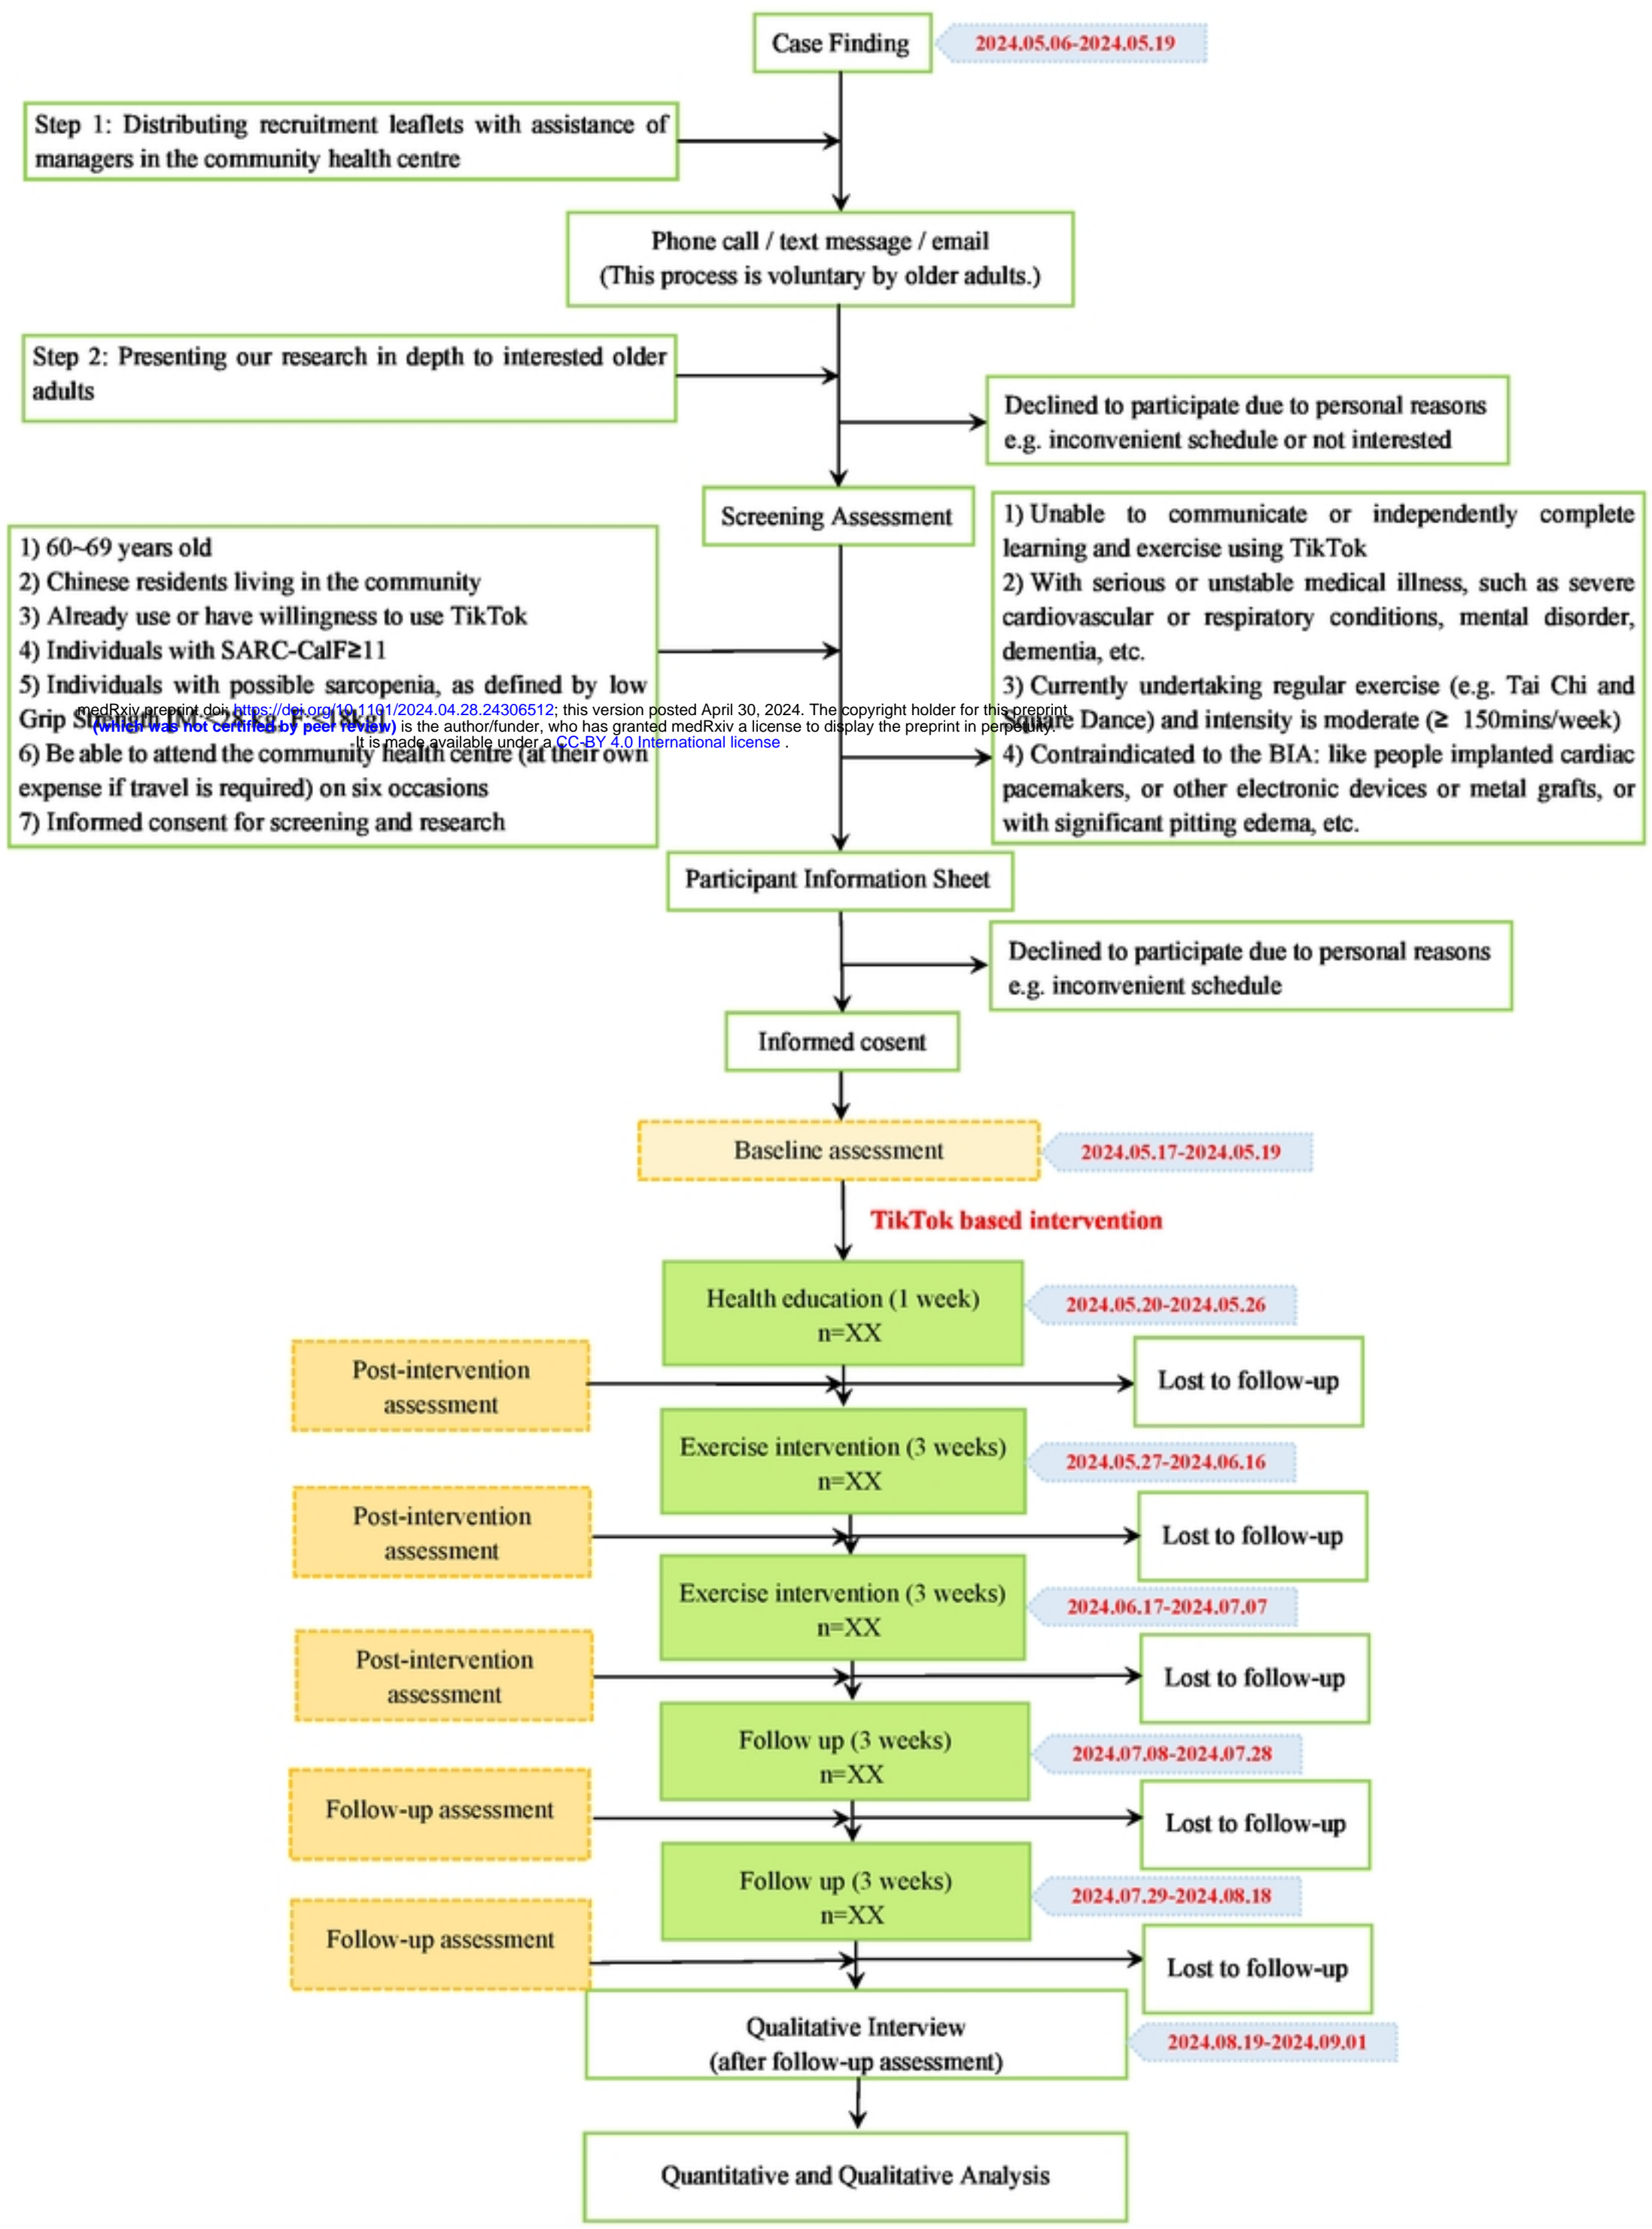



medRxiv preprint doi: <https://doi.org/10.1101/2024.04.28.24306512>; this version posted April 30, 2024. The copyright holder for this preprint (which was not certified by peer review) is the author/funder, who has granted medRxiv a license to display the preprint in perpetuity. It is made available under a [CC-BY 4.0 International license](#).

**Figure 1. A brief diagram of the feasibility study procedure and timeline**

medRxiv preprint doi: <https://doi.org/10.1101/2024.04.28.24306512>; this version posted April 30, 2024. The copyright holder for this preprint (which was not certified by peer review) is the author/funder, who has granted medRxiv a license to display the preprint in perpetuity. It is made available under a [CC-BY 4.0 International license](#).
